# Supplementary material for: Enhanced room temperature ammonia gas sensing based on a multichannel PSS-functionalized graphene/PANI network
Source: Royal Society of Chemistry journal article supplement (doi:10.1039/d4an01488j), 2025-01-01
Supplement: d4an01488j1.pdf [file d4an01488j1.pdf]

## *Supporting Information*

# Enhanced room temperature ammonia gas sensing based on multichannel PSS-functionalized graphene/PANI network

Hongping Liang,<sup>a</sup> Ye Zhu,<sup>a</sup> Zhenting Zhao,<sup>a</sup> Zilun Tang,<sup>\*a, b</sup> Yue Niu,<sup>c</sup> Duoduo Zhang,<sup>a</sup> Yao Wang,<sup>\*d</sup>

Weiping Gong<sup>\*a</sup>

<sup>a</sup> *Guangdong Provincial Key Laboratory of Electronic Functional Materials and Devices, Huizhou University, Huizhou, 516007, China*

<sup>b</sup> *School of Chemistry and Materials Engineering, Huizhou University, Huizhou, 516007, China.*

<sup>c</sup> *School of Physical Sciences, Great Bay University, Dongguan 523000, P. R. China.*

<sup>d</sup> *Institute of Electronic Paper Displays, South China Academy of Advanced Optoelectronics, South China Normal University, Guangzhou 510006, P. R. China.*

*\* Corresponding author.*

*E-mail addresses:* Arrontzl@163.com (Z. Tang), wangyao@m.scnu.edu.cn (Y. Wang),

gwp@hzu.edu.cn (W. Gong).

To investigate the effect of the aniline concentration on their morphology, PSS-rGO/PANI-0.2, PSS-rGO/PANI-0.15, PSS-rGO/PANI-0.1, and PSS-rGO/PANI-0.05 nanocomposites were obtained by increasing the amount of aniline. Fig. S1 shows the SEM images of PSS-rGO/PANI-0.2, PSS-rGO/PANI-0.15, PSS-rGO/PANI-0.1, and PSS-rGO/PANI-0.05 nanocomposites.

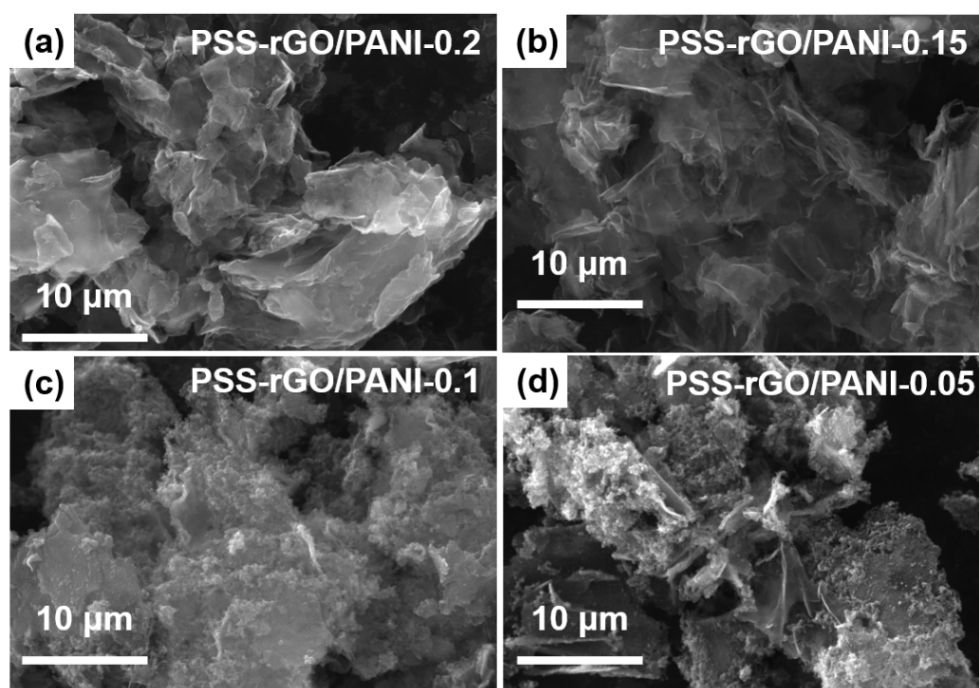

Fig. S1. SEM images of (a) PSS-rGO/PANI-0.2, (b) PSS-rGO/PANI-0.15, (c) PSS-rGO/PANI-0.1 and (d) PSS-rGO/PANI-0.05.

Furthermore, to highlight the importance of the freeze-drying process on their morphology, NoF-PSS-rGO/PANI-0.5, NoF-PSS-rGO/PANI-1, NoF-PSS-rGO/PANI-2, and NoF-PSS-rGO/PANI-4 nanocomposites were obtained by using the NoF-PSS-rGO. Fig. S2 shows the SEM images of NoF-PSS-rGO/PANI-0.5, NoF-PSS-rGO/PANI-1, NoF-PSS-rGO/PANI-2, and NoF-PSS-rGO/PANI-4 nanocomposites.

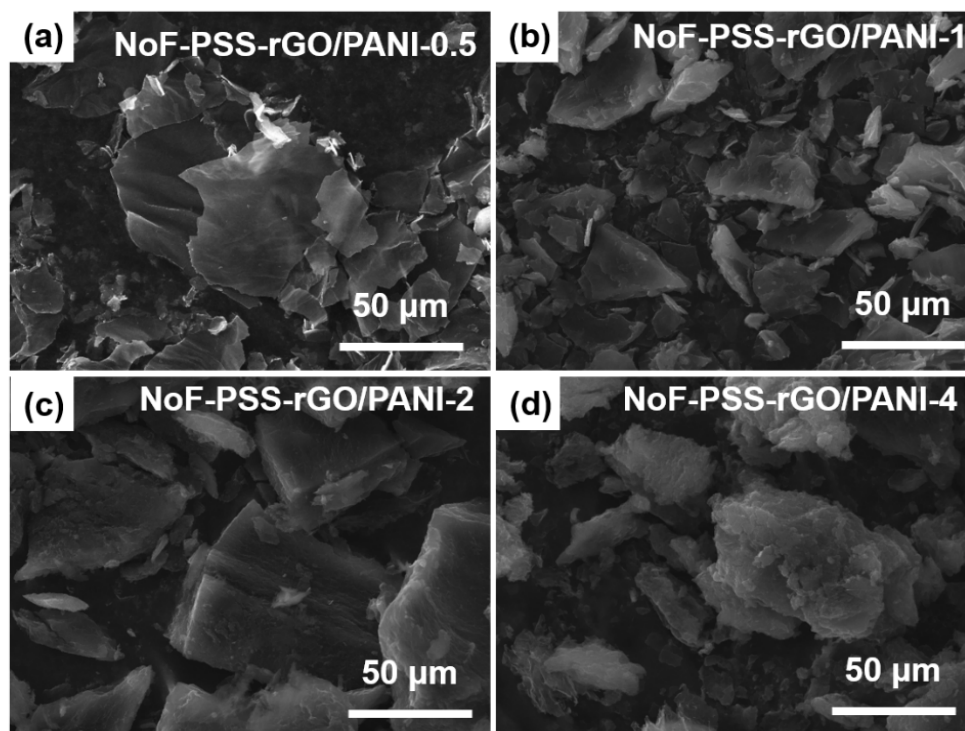

Fig.S2. SEM images of (a) NoF-PSS-rGO/PANI-0.5, (b) NoF-PSS-rGO/PANI-1, (c) NoF-PSS-rGO/PANI-2 and (d) NoF-PSS-rGO/PANI-4.

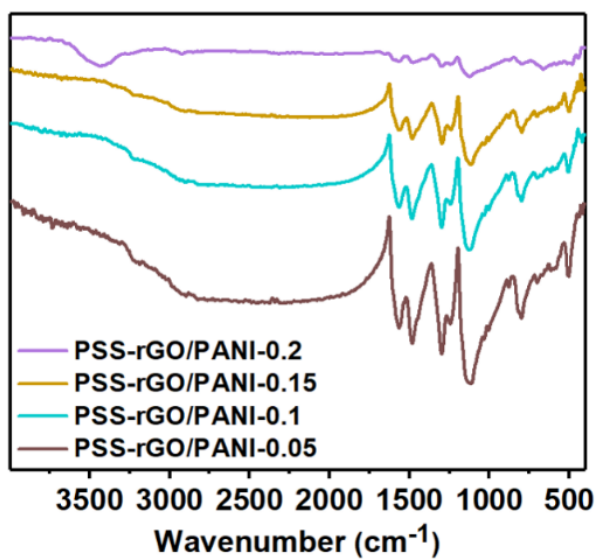

Fig.S3. FTIR spectra of PSS-rGO/PANI-0.2, PSS-rGO/PANI-0.15, PSS-rGO/PANI-0.1 and PSS-rGO/PANI-0.05.

Table S1 XPS analysis of PANI and PSS-rGO/PANI-2

| Sensing materials  | C 1s (Atomic %) | O 1s (Atomic %) | N 1s (Atomic %) | S 2p (Atomic %) |
|--------------------|-----------------|-----------------|-----------------|-----------------|
| PANI               | 80.78           | 12.61           | 6.06            | 0.54            |
| PSS-rGO/PANI-<br>2 | 72.74           | 16.78           | 6.15            | 4.33            |

Table S2 Fitting ratios of N 1s spectra in PANI and PSS-rGO/PANI-2

| Name               | Peak BE | Atomic % (PANI) | Peak BE | Atomic % (PSS-rGO/PANI-2) |
|--------------------|---------|-----------------|---------|---------------------------|
| -N= (%)            | 398.7   | 35.43           | 398.5   | 29.05                     |
| -NH-(%)            | 399.4   | 40.05           | 399.2   | 33.63                     |
| N <sup>+</sup> (%) | 400.0   | 24.52           | 400.5   | 37.32                     |
